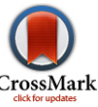

# IL-22 Negatively Regulates *Helicobacter pylori*-Induced CCL20 Expression in Gastric Epithelial Cells

Jia-Perng Chen<sup>1</sup>, Ming-Shiang Wu<sup>2</sup>, Sung-Hsin Kuo<sup>3,4</sup>, Fang Liao<sup>1,5\*</sup>

**1** Institute of Microbiology and Immunology, National Yang-Ming University, Taipei, Taiwan, **2** Department of Internal Medicine, National Taiwan University Hospital and National Taiwan University College of Medicine, Taipei, Taiwan, **3** Department of Oncology, National Taiwan University Hospital, Taipei, Taiwan, **4** Cancer Research Center and Graduate Institute of Oncology, National Taiwan University College of Medicine, Taipei, Taiwan, **5** Institute of Biomedical Sciences, Academia Sinica, Taipei, Taiwan

## Abstract

*Helicobacter pylori* is a Gram-negative bacterium that infects the human gastric mucosa and causes various gastric diseases. *H. pylori* infection induces the production of inflammatory chemokine CCL20 in gastric mucosa and leads to gastric inflammation. Given that the IL-22/IL-22R axis plays a critical role in the regulation of homeostasis and inflammation of epithelial cells at barrier surfaces, we investigated the effect of IL-22 on CCL20 expression induced by *H. pylori*. We demonstrated that *H. pylori* infection of the gastric epithelia-derived AGS cells significantly induced CCL20 expression and the induction was inhibited by IL-22. Functional analysis of the *CCL20* promoter revealed that the *H. pylori*-induced CCL20 expression required the activation of NF- $\kappa$ B, and that IL-22 inhibited the induction by attenuating NF- $\kappa$ B activation. Knockdown of endogenous STAT3 by either short interfering RNAs or a short hairpin RNA significantly reduced the inhibitory effect of IL-22. Furthermore, STAT3 phosphorylation elicited by IL-22 was crucial for the inhibition of *H. pylori*-induced CCL20 expression. Consistent with the *in vitro* data showing that IL-22 negatively regulated *H. pylori*-induced CCL20 expression in gastric epithelial cells, studies on the tissue sections from patients with *H. pylori* infection also revealed an inverse association of IL-22 expression and CCL20 expression *in vivo*. Together, our findings suggest that IL-22 plays a role in the control of overproduction of the inflammatory chemokine and thus may protect the gastric mucosa from inflammation-mediated damage.

**Citation:** Chen J-P, Wu M-S, Kuo S-H, Liao F (2014) IL-22 Negatively Regulates *Helicobacter pylori*-Induced CCL20 Expression in Gastric Epithelial Cells. PLoS ONE 9(5): e97350. doi:10.1371/journal.pone.0097350

**Editor:** Gernot Zissel, University Medical Center Freiburg, Germany

**Received:** December 30, 2013; **Accepted:** April 18, 2014; **Published:** May 13, 2014

**Copyright:** © 2014 Chen et al. This is an open-access article distributed under the terms of the Creative Commons Attribution License, which permits unrestricted use, distribution, and reproduction in any medium, provided the original author and source are credited.

**Funding:** This study was supported by an intramural fund from the Institution of Biomedical Sciences, Academia Sinica. The funder had no role in study design, data collection and analysis, decision to publish, or preparation of the manuscript.

**Competing Interests:** The authors have declared that no competing interests exist.

\* E-mail: fl9z@ibms.sinica.edu.tw

## Introduction

*Helicobacter pylori* is a Gram-negative flagellate bacterium that infects the human gastric mucosa [1]. *H. pylori* infection is asymptomatic in most cases, and can persist for a long period of time. *H. pylori* is thought to be a causative agent for the development of gastric inflammatory diseases including gastritis, gastric carcinoma, and mucosa-associated lymphoid tissue lymphoma (MALToma) [2,3], in which inflammation plays a critical role. The inflammation is associated with the infiltration of leukocytes as well as the production of inflammatory cytokines and chemokines. It has been widely reported that *H. pylori* infection leads to a Th1 immune response in both human and animal studies [4–7]. However, recent studies have demonstrated that *H. pylori* infection is also associated with the production of IL-17, indicating that *H. pylori* infection also elicits the Th17 immune response [8–10].

Interleukin-22 (IL-22), a member of the IL-10 family of cytokines, is mainly produced by hematopoietic cells involved in both innate and adaptive immunity [11]. IL-22 is produced by subsets of T cells including Th17 and Th22 [12,13],  $\gamma\delta$  T cells [14], and subsets of NK cells [15,16] in humans. Recently, a subset of innate lymphocyte cells (ILCs) was also reported to produce IL-22 [16,17]. IL-22 targets cells through the IL-22R receptor, which is composed of IL-22R1 and IL-10R2 [18–20]. Of note, IL-22R1

is not expressed in hematopoietic cells, but exclusively expressed in the skin, respiratory and digestive tissues [21], suggesting that IL-22 plays a pivotal role in host defense and immune response at epithelial barriers. IL-22 receptor activation is mediated by STAT3 activation [19,22]. The functionality of IL-22 in the regulation of intestinal and skin immunity has been widely studied [11]. Interestingly, IL-22 enhances the expression of antimicrobial proteins in bacteria infection, suggesting that IL-22 may play a role in host defense against bacterial infection in skin and gut [23,24]. The involvement of IL-22 in gastric epithelial cells infected with *H. pylori* has not yet been investigated, although it is suggested by several recent observations. Firstly, IL-22 is produced by Th17 cells [12] which have been shown to mediate *H. pylori* infection [8–10]. Secondly, IL-22 mRNA expression was reported to be up-regulated in mice infected with *H. felis* [25]. And lastly, we recently identified five single nucleotide polymorphisms (SNPs) of IL-22 that were significantly associated with *H. pylori*-induced gastric MALToma (unpublished data). Taken together, IL-22 likely plays a role in *H. pylori*-induced gastric diseases.

Chemokine receptor CCR6 is expressed on immature dendritic cells, B cells, memory and effector T cells, Th17 in particular [26–30]. Very recently, CCR6 expression has been detected in subsets of innate lymphoid cells [31,32], important immune cells regulating intestinal immunity. CCR6 plays important roles in gut mucosal immunity [33–36]. CCL20, the only chemokine

ligand for CCR6, is highly associated with gastrointestinal homeostasis and inflammation [34–36]. The CCR6/CCL20 axis is important for the regulation of gut inflammation [34–36] and for the formation of isolated lymphoid follicles (ILFs) in the intestine [35,37]. Several reports have shown that CCL20 was detected in gastric mucosa infected by *H. pylori* [38–41]; however, the molecular mechanism on the induction of CCL20 by *H. pylori* in gastric epithelial cells remains to be determined.

In this study, we investigated the mechanism on the induction of CCL20 by *H. pylori* in a gastric epithelial cell line-AGS. In addition, given that CCL20 and IL-22 are highly involved in barrier immunity, we investigated the interplay between CCL20 and IL-22 in gastric epithelial cells infected with *H. pylori*. We found that *H. pylori* infection significantly induced CCL20 expression mediated by NF- $\kappa$ B activation and that the *H. pylori*-induced CCL20 expression was significantly inhibited by IL-22.

## Methods and Materials

### AGS gastric epithelial cell line and *H. pylori* culture

AGS cells (human gastric adenocarcinoma epithelial cell line from ATCC) were grown in the RPMI 1640 medium (Gibco, Grand Island, NY) supplemented with 10% heat-inactivated FBS (Gibco) and 2 mM L-glutamine (Gibco) and maintained at 37°C in a humidified-atmosphere of 5% CO<sub>2</sub>. *H. pylori* NTUH-C1 strain was isolated from a patient with duodenal ulcer in National Taiwan University Hospital (Taipei, Taiwan). The strain is a naturally competent clinical isolate that was *cagA*<sup>+</sup> and *vacA*<sup>+</sup> [42]. The bacteria were grown on CDC anaerobe 5% sheep blood agar plate (BD Bioscience) under microaerophilic conditions at 37°C for 16 h, harvested and resuspended in PBS. The bacteria were then diluted with the cell culture medium for further experiments.

### Real time PCR analysis for CCL20

Total RNAs were isolated from AGS cells using the Trizol reagent (Life Technologies, Grand Island, NY) and reverse transcribed into cDNA using the SuperScript III First-Strand Synthesis System (Life Technologies) according to the manufacturer's protocol. Real-time PCR for CCL20 was performed using the TaqMan Gene Expression Assays purchased from Applied Biosystems (Foster City, CA). The PCR cycling protocol entailed 1 cycle at 95°C for 10 min, followed by 40 cycles of 95°C for 15 s and 60°C for 1 min. The human *GAPDH* was used as an endogenous control. The resultant PCR products were measured by Real-time PCR 7500 (Applied Biosystems). The 2<sup>- $\Delta\Delta$ Ct</sup> method was used to quantify the relative changes in CCL20 expression (ABI PRISM 7700 Sequence Detection System, User Bulletin 2, Applied Biosystems, 1997).

### Construction of CCL20 luciferase reporter genes

Segments of the CCL20 promoter from -862 to +71 (short form) and -3491 to +71 (long form) were PCR-amplified from human genomic DNA extracted from MOLT-4 cells using the following primers (forward primer: 5'-GAGAGTTCTTA-TACTGCCTTA-3' and 5'- TTCCTAGTTTGTGAGTGTT-3' for the short form and the long form, respectively; common reverse primer: 5'-TGGTTTTAGCTCAAAGAAC-3') and cloned into the pGL3-Basic firefly luciferase reporter vector (Promega, Mannheim, Germany) to generate pGL3-862 and pGL3-3491 CCL20 reporter constructs. Reporter constructs containing sequentially truncated fragments (-394, -204, -150, -112, -91 and -50 to +71) of the CCL20 promoter region were generated in a similar manner as described for generating pGL3-862 and pGL3-3491. Mutant reporter constructs containing

targeted substitutions in the C/EBP, NF- $\kappa$ B and SP-1 binding sites were generated using the site-directed mutagenesis kit (Stratagene, La Jolla, CA) with the following primers (C/EBP, 5'-GATGACATGATGGGGCCAGGTTATACCTGGGGAAA-ACCCCATGTGGCAAC-3'; NF- $\kappa$ B, 5'-GGGCCAGTTGATC-AATGGGGAAGGGGCCATGTGGCAACACGC-3'; SP-1, 5'-CCATGTGGCAACACGCATTCTGTGTACATTCCC-3').

### Cell transfection and luciferase assay

AGS cells were seeded in 12-well plates (3×10<sup>5</sup>/well) and transiently transfected with 0.2 μg of CCL20 reporter constructs, truncated CCL20 reporter constructs, mutant CCL20 reporter constructs, or an NF- $\kappa$ B-luciferase reporter plasmid (pGL4.32[luc2P/NF- $\kappa$ B-BE/Hygro], Promega) using Lipofectamine 2000 (Invitrogen, Carlsbad, CA) according to the manufacturer's instructions. To normalize the transfection efficiency, 10 ng of the pRL-TK Renilla luciferase control vector (Promega, Madison, WI) was cotransfected with each test construct. Five hours after transfection, Lipofectamine 2000 was removed and replaced with complete RPMI 1640 medium. After 16-h culturing, AGS cells were washed three times with PBS and cultured in serum-free RPMI 1640 medium containing 0.5% BSA plus 2 mM L-glutamine for 16 h to reduce the luciferase background levels. AGS transfectants were then pretreated with 10 ng/ml IL-22 (R&D Systems, Minneapolis, MN) for 1 h followed by *H. pylori* infection at a MOI of 15. After the addition of *H. pylori* into the AGS transfectants, the culture plates were subjected to centrifugation at 500 × g for 5 min at room temperature to synchronize the infection. After 6-h infection, cells were washed twice with PBS and lysed in 200 μl passive lysis buffer (Promega, Madison, WI). Firefly and Renilla luciferase activities in AGS cell lysates were measured simultaneously using the Dual-Luciferase Reporter Assay System (Promega) according to the manufacturer's instruction and an Optocomp II luminometer (MGM Instruments, Hamden, CT).

### Preparation of cytosolic and nuclear extracts for EMSA analysis

AGS cells were lysed in a lysis buffer (10 mM HEPES pH 7.9, 1.5 mM MgCl<sub>2</sub>, 10 mM KCl, protease inhibitor cocktail, 0.5 mM DTT and 0.6% NP-40) followed by centrifugation at 12,000 × g for 5 min at 4°C. The supernatants (cytosolic fractions) were collected and stored at -80°C. The pellets were further solubilized in an extraction buffer (20 mM HEPES pH 7.9, 1.5 mM MgCl<sub>2</sub>, 420 mM NaCl, protease inhibitor cocktail, 25% glycerol), kept on ice for 15 min, and centrifuged at 12,000 × g for 5 min at 4°C. The supernatants (nuclear fractions) were collected and stored at -80°C.

### Electrophoretic mobility shift assay (EMSA)

A double-stranded oligonucleotide containing the consensus NF- $\kappa$ B binding site was prepared by the synthesis of complementary oligonucleotides spanning the sequence from -87 to -57 of the CCL20 promoter (5'- ATCAATGGGGAAAACCC-CATGTGGCAACACG-3'). To anneal, equal moles of the complementary oligonucleotides were mixed, heated to 95°C and gradually cooled down to 37°C on a heating block. The double-stranded oligonucleotide was end-labeled with [ $\gamma$ -<sup>32</sup>P] ATP (PerkinElmer) using T4 polynucleotide kinase to a specific activity of 2 to 4×10<sup>7</sup> cpm/μg. In a 10-μl reaction, the nuclear extract (10 μg) in the binding buffer (20 mM HEPES pH 7.9, 1 mM DTT, 2.5 mM MgCl<sub>2</sub>, 40 mg/ml BSA, 50 mM KCl, 2 μg poly dI:dC) was incubated with the probe (1×10<sup>4</sup> cpm) at room

temperature for 30 min. The probe-protein complexes were separated from the free probe on a 6% native polyacrylamide gel in the TGE buffer (25 mM Tris, 189 mM glycine, 1 mM EDTA) and visualized by autoradiography. Competition assays were performed by incubating nuclear extracts with labeled probes in the presence of 100-fold molar excess of unlabeled oligonucleotides for 30 min at room temperature. To perform supershift experiments, nuclear extracts were incubated with labeled probes in the presence of 0.4  $\mu$ g of an antibody against NF- $\kappa$ B p65 (sc-372, Santa Cruz Biotechnology) or NF- $\kappa$ B p50 (sc-114, Santa Cruz Biotechnology) for 1 h at room temperature. Preimmune rabbit IgG was used as a control antibody.

### Chromatin Immunoprecipitation assay (ChIP)

The ChIP assay was performed using the Magna Chip A kit (Upstate Biotechnology, Lake Placid, NY) according to the manufacturer's instructions. Briefly, AGS cells were treated with 1% formaldehyde at room temperature for 15 min. Glycine was added to a final concentration of 0.125 M to stop the cross-linking reaction. The cells were collected and lysed followed by centrifugation at  $2000\times g$  for 5 min. The pellets were collected and resuspended in the nuclear lysis buffer followed by sonication to shear DNA to approximately 500 to 1000 bp fragments using Bioruptor UCD-200 (Diagenode, Liege, Belgium). The cross-linked chromatin was subjected to immunoprecipitation with a rabbit anti-p65 antibody (Cell signal, Danvers, MA) or an isotype antibody overnight at 4°C followed by the addition of protein A magnetic beads (Upstate Biotechnology). After 5-h incubation at 4°C, the immunoprecipitates were then sequentially washed with low salt, high salt, LiCl and finally TE buffer. The washed immunoprecipitates were then subjected to cross-link reversal in the elution buffer at 65°C overnight followed by removal of the beads using a magnetic separator. DNAs in the supernatants were purified and subjected to quantitative PCR analysis using primers designed from the NF- $\kappa$ B consensus binding site in the *CCL20* promoter (forward, 5'-CAGGATTCTCCCCTTCTCAAC-3'; reverse, 5'-GGGATGGCCCTATTATAGCA-3') and SYBR Green fluorescent dye (Bio-Rad). The immunoprecipitated DNAs from each sample were normalized to the input DNA.

### Small interfering RNA (siRNA)

Two siRNAs targeting human *STAT3* were purchased from Qiagen (Gaithersburg, MD). To knockdown endogenous *STAT3*, AGS cells were plated in 6-well plates ( $3\times 10^5$ /well) followed by the transfection of siRNA (100 pmole/well) using Lipofectamine 2000 (Invitrogen, Carlsbad, CA). After 5-h incubation, the transfectants were collected and plated in 12-well plates ( $3\times 10^5$ /well). About 36-h post-transfection, the AGS cells were infected with *H. pylori* in the absence or presence of IL-22 for 6 h. The knockdown efficiency of *STAT3* in the cells was determined by Western blotting with an antibody specific for *STAT3*. The membrane was stripped and re-probed with an antibody to  $\beta$ -actin. The culture supernatants were collected for the detection of CCL20 concentration by ELISA.

### Lentivirus mediated knockdown of *STAT3*

Two pLKO.1 based constructs TRCN0000020841 (sh-*STAT3*#7) and TRCN0000020842 (sh-*STAT3*#8) expressing specific human *STAT3* shRNA were obtained from the National RNAi Core Facility, Academia Sinica, Taipei, Taiwan. The recombinant lentiviruses were generated by co-transfection of the pLKO.1 constructs along with pCMV $\Delta$ R8.91 (packaging plasmid) and pMD.G (envelope plasmid) into 293 T cells. Infectious lentivirus was harvested at 40 and 64 h after transfection. To

determine the *STAT3* knockdown efficiency, AGS cells were transduced with the recombinant lentivirus for 24 h. The transduced cells were further selected by 5  $\mu$ g/ml puromycin (Sigma) for 48 h. The knockdown efficiency of *STAT3* in cells was determined by Western blotting analysis. For the *H. pylori* infection experiments, the transduced AGS cells were seeded in 12-well plates ( $3\times 10^5$ /well) and fasted overnight. The fasted AGS cells were pretreated with or without 10 ng/ml IL-22 for 1 h followed by infection with *H. pylori* at a MOI of 15. After infection for 6 h, the concentration of CCL20 in the supernatants was determined by ELISA.

### Overexpression of wild-type *STAT3* or dominant negative *STAT3* in AGS cells with silenced endogenous *STAT3*

Plasmids encoding wild type *STAT3* (pCMV2-FLAG-*STAT3*) and dominant negative *STAT3* (pCMV2-FLAG-*STAT3*DN) were generated by cloning the coding regions of wild-type or dominant negative *STAT3* (Y705F) into pFLAG-CMV2. AGS cells were transfected with si-RNA#b together with either pCMV2-FLAG-*STAT3* or pCMV2-FLAG-*STAT3*DN. At 36-h post-transfection, the transfectants were infected with *H. pylori* in the presence or absence of IL-22 followed by the determination of CCL20 concentration in cell culture supernatants at 6-h post-infection.

### Measurement of CCL20 production by ELISA

CCL20 in the cell culture supernatants was measured by ELISA (R&D system) according to the manufacturer's protocol.

### Western blot analysis

AGS cells were lysed in the Lysis-M Reagent (Roch, Mannheim, Germany) containing protease inhibitor cocktail (Roch) and phosphatase inhibitor cocktail (Sigma, St. Louis, MO). Fifty micrograms of cell lysate proteins were separated under reducing conditions on a 7.5% SDS-polyacrylamide gel and proteins were then transferred onto nitrocellulose membranes (Perkin Elmer, Waltham, MA). The membranes were blocked with 5% milk in TTBS (150 mM NaCl, 100 mM Tris pH 7.5, 0.1% Tween 20) for 1 h before incubated with anti-phospho-*STAT3* (Cell signal Technology, Beverly, MA) at 4°C overnight, followed by three washes. The membrane was then incubated with peroxidase conjugated goat anti-rabbit antibody for 1 h at room temperature followed by three washes, and finally subjected to chemiluminescence using the ECL reagent (Perkin Elmer, Waltham, MA). The same membrane was subsequently stripped and blotted with anti-*STAT3* (Santa Cruz Biotechnology) or anti- $\beta$ -actin (Sigma-Aldrich).

### Functional blockade of IL-22 receptor

AGS cells were pretreated with 2  $\mu$ g/ml of a neutralizing antibody against IL-22R1 (AF2770; R&D Systems, Minneapolis, MN) for 1 h before being infected with *H. pylori* in the absence or presence of IL-22.

### Ethics statement and immunohistochemistry (IHC)

Tissue samples were collected from patients with *H. pylori*-induced MALToma at National Taiwan University Hospital with written informed consent. The study was approved by National Taiwan University Hospital Research Ethics Committee (IRB protocol: NTUH-9561703044). Tissue samples were subjected to IHC analysis for detecting CCL20 and IL-22 expression. Formalin-fixed paraffin embedded sections at a thickness of 4  $\mu$ m were deparaffinized with xylene followed by rehydration

with a graded descending series of alcohol. After antigen retrieval by heating in a 0.1M citrate buffer at pH 6, the endogenous peroxidase activity was blocked by 3% H<sub>2</sub>O<sub>2</sub>. The sections were then incubated in 2.5% normal blocking serum for 30 min followed by the incubation with a primary antibody to CCL20 (AF360; R&D Systems, Minneapolis, MN) or IL-22 (ab18499, Abcam, Cambridge, MA) for overnight. Protein expression was detected using the Super Sensitive Polymer-HRP IHC Detection System (BioGenex Laboratories Inc., San Ramon, CA). The immunostaining procedure was performed according to Maae et al [43]. The percentages of CCL20 or IL-22 positive cells were averaged to yield an immunohistologic score ranging from 0% to 100%. The results were classified into two groups (positive-immunostaining group and negative-immunostaining group) according to the intensity and extent of staining. For the negative-immunostaining group, either no staining was present (staining intensity score = 0) or positive staining was detected in less than 10% of the cells (staining intensity score = 1); for the positive-staining group, moderate or strong immunostaining was present in 10% to 30% (staining intensity score = 2) or more than 30% of the cells (staining intensity score = 3).

### Statistical analysis

The unpaired Student *t* test was used to evaluate the significance of the difference between two experimental results. For the analysis of patients' tissue sections for IHC staining, the Fisher's exact test was used for statistical analysis due to small sample size (*n* = 24). A *p* value <0.05 was considered statistically significant.

## Results

### IL-22 inhibits the expression of CCL20 induced by *H. pylori* infection in gastric epithelial cells

Given that CCL20 plays a role in gut mucosal inflammation [34–36] and that CCL20 expression is detected in mucosal tissues infected by *H. pylori* [38,40,41], we examined whether CCL20 expression was induced in the human gastric epithelial cell line-AGS cells upon *H. pylori* infection. Infection of AGS cells with *H. pylori* at various MOI resulted in CCL20 induction. The optimal MOI for CCL20 induction was 15 (Fig. 1A), and CCL20 mRNA expression peaked at 3-h post-infection (Fig. 1B). Consistent with the induction of CCL20 mRNA, CCL20 protein secretion was also increased in AGS cells infected with *H. pylori* (Fig. 1C). These

results demonstrate that *H. pylori* infection induces CCL20 expression at both mRNA and protein levels in gastric epithelial cells.

IL-22 is known to play a role in mucosa immunity [11,44–46] and targets cells through the IL-22 receptor, which is composed of two receptor chains, IL-22R1 and IL-10R2 [19,20,22]. IL-22R1 is a receptor specific for IL-22 and exclusively expressed in barrier tissues, while IL-10R2 is broadly expressed in a variety of tissues [22]. Given that both IL-22 and CCL20 are highly involved in the regulation of mucosal immunity and/or inflammation, we investigated the interplay between IL-22 and CCL20 in *H. pylori*-infected AGS cells. We first demonstrated by FACS analysis that AGS cells expressed IL-22R1 (Fig. 2A). The presence of IL-22 during *H. pylori* infection of AGS cells led to the inhibition of *H. pylori*-induced CCL20 expression in a dose-dependent manner (Fig. 2B). IL-22 (10 ng/ml) significantly inhibited *H. pylori*-induced CCL20 expression at both mRNA (*p*<0.005) (Fig. 2C) and protein (*p*<0.02) levels (Fig. 2D) and the inhibitory effect was about 40% for both. To demonstrate that the inhibition of *H. pylori*-induced CCL20 was indeed mediated by IL-22, we functionally blocked IL-22R in AGS cells with a neutralizing anti-IL-22R1 antibody before infecting cells with *H. pylori* in the absence or presence of IL-22 and CCL20 secretion was measured in culture supernatants. Blocking the IL-22 receptor completely abolished the inhibitory effect of IL-22 on *H. pylori*-induced CCL20 expression (Fig. 2E). Similarly, IL-22R1 knockdown by siRNA also significantly reduced the inhibitory effect of *H. pylori*-induced CCL20 expression by IL-22 (Figure S1).

### The inhibition of *H. pylori*-induced CCL20 expression by IL-22 is mediated by transcriptional regulation

We next examined whether the IL-22-attenuated *H. pylori*-induced CCL20 expression was mediated by reducing the transcriptional activity of CCL20. To identify the region of the CCL20 promoter responsible for CCL20 gene transactivation in response to *H. pylori*, we generated two pGL3-CCL20 reporter constructs, pGL3-862 and pGL3-3491 containing a 933-bp (from -862 to +71) and a 3562-bp (from -3491 to +71) segment, respectively, of the human CCL20 5'-flanking region linked upstream to the firefly luciferase coding sequence. The pGL3-CCL20 constructs were transfected into AGS cells followed by *H. pylori* infection in the presence or absence of IL-22 (10 ng/ml). Cells transfected with pGL3-862 expressed similar relatively

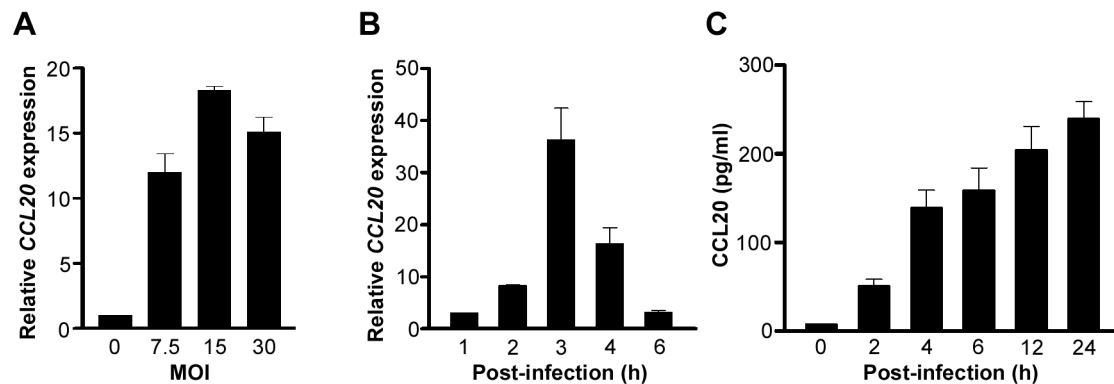

**Figure 1. *H. pylori* infection induces CCL20 expression in AGS cells.** *A*, CCL20 mRNA expression in AGS cells infected with *H. pylori* at indicated MOI was analyzed by real-time PCR at 3-h post-infection. *B*, CCL20 mRNA expression in AGS cells infected with *H. pylori* (MOI = 15) was analyzed by real-time PCR at indicated times. *C*, The cell culture supernatants from AGS cells infected with *H. pylori* were collected at the indicated times and the CCL20 protein level was determined by ELISA. Data represent the mean  $\pm$  SEM and reflect one representative of three independent experiments. doi:10.1371/journal.pone.0097350.g001

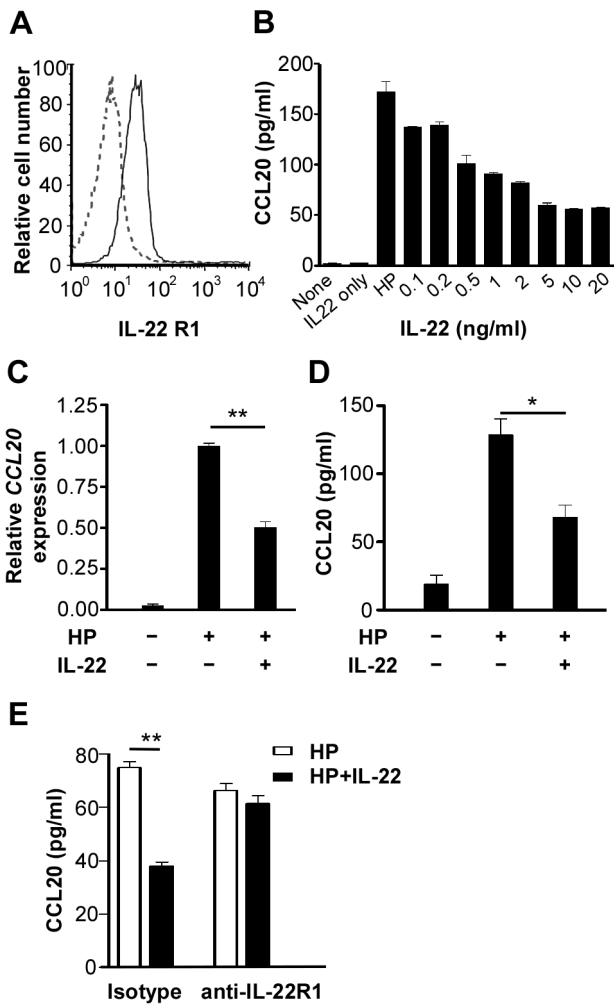

**Figure 2. Stimulation of AGS cells with IL-22 leads to the inhibition of *H. pylori*-induced CCL20 expression.** *A*, AGS cells were stained with an isotype control antibody (dashed line) or an anti-IL-22R1 antibody (solid line) conjugated with allophycocyanin and analyzed by flow cytometry. *B*, AGS cells were infected with *H. pylori* (HP) in the presence of various concentration of IL-22 for 24 h and the CCL20 concentration in the culture supernatants was determined by ELISA. *C-D*, AGS cells were infected with *H. pylori* in the presence or absence of IL-22 and the CCL20 mRNA in the cells (*C*) and CCL20 protein in the culture supernatants (*D*) were determined by real-time PCR and ELISA, respectively. *E*, AGS cells were pretreated with a neutralizing antibody against IL-22R1 (2 µg/ml) for 1 h followed by the *H. pylori* infection in the absence or presence of IL-22 for 6 h. The CCL20 concentration in the culture supernatants was determined by ELISA. Data represent the mean ± SEM from three independent experiments. \*\*,  $p < 0.005$ ; \*,  $p < 0.02$  for *H. pylori* + IL-22 versus *H. pylori* only. doi:10.1371/journal.pone.0097350.g002

luciferase activities as compared with cells transfected with pGL3-3491 (Fig. 3). Furthermore, IL-22 exerted similar inhibitory effects on luciferase activities in cells transfected with pGL3-862 and pGL3-3491 ( $p < 0.01$  for pGL3-386;  $p < 0.05$  for pGL3-3491) (Fig. 3). These results suggest that the CCL20 promoter region responsible for IL-22-attenuated CCL20 induction is located within 862 bp upstream of the transcription initiation site.

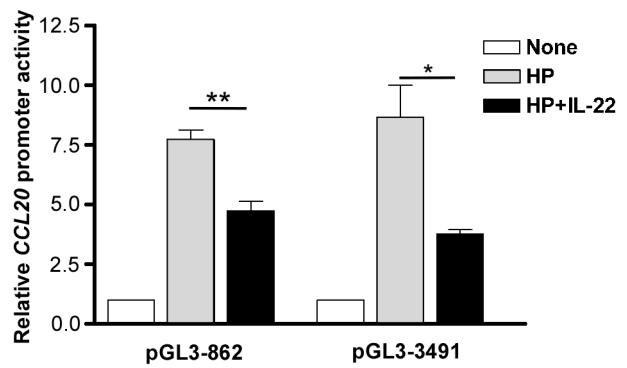

**Figure 3. IL-22 inhibits CCL20 promoter reporter activities in AGS cells infected with *H. pylori*.** AGS cells were co-transfected with the CCL20 luciferase reporter construct pGL3-862 or pGL3-3491 along with pRL-TK *Renilla* luciferase plasmid. At 48 h after transfection, cells were infected with *H. pylori* in the presence or absence of IL-22. Luciferase activities were normalized to the expression of the cotransfected pRL-TK *Renilla* luciferase plasmid. The activity from each construct is presented as the relative luciferase activity of *H. pylori*-infected cells versus uninfected cells (open bar; set as 1). Data represent the mean ± SEM from three independent experiments. \*,  $p < 0.05$ ; \*\*,  $p < 0.01$  for *H. pylori* + IL-22 versus *H. pylori* only. doi:10.1371/journal.pone.0097350.g003

*H. pylori*-induced CCL20 expression via NF-κB activation is inhibited by IL-22

The CCL20 promoter region has been reported to contain several putative binding sites for transcription factors, including NF-1, Ets, AP-1, C/EBP, NF-κB and SP1 [47–49]. These binding sites are schematically shown in Fig. 4A. To identify the cis-acting elements that are responsible for IL-22-attenuated CCL20 induction, we generated a series of constructs with sequential deletions from the 5' end of the CCL20 promoter in pGL3-862 to positions -394 (pGL3-394), -204 (pGL3-204), -150 (pGL3-150), -112 (pGL3-112), -91 (pGL3-91), and -50 (pGL3-50) (Fig. 4A) and transfected these constructs into AGS cells followed by *H. pylori* infection in the presence or absence of IL-22. IL-22 treatment reduced *H. pylori*-induced CCL20 reporter activities about 40% in AGS cells transfected with all CCL20 deletion constructs except pGL3-50 (Fig. 4B), suggesting that the element(s) responsible for the IL-22-attenuated CCL20 induction was located within the -91 to -50 region which contained putative binding sites for three transcription factors, namely C/EBP, NF-κB and SP-1. To determine which transcription factor(s) was responsible for the IL-22-attenuated CCL20 induction, we performed site-directed mutagenesis on pGL3-862 to generate constructs pGL3-C/EBPm, pGL3-NF-κBm, and pGL3-SP-1m which contained nucleotide substitutions in the consensus binding site for C/EBP, NF-κB, and SP1, respectively (Fig. 5A). We also deleted nt -91 to -50 in pGL3-862 to generate a deletion construct pGL3-d91-50. These constructs were transfected into AGS cells followed by *H. pylori* infection in the absence or presence of IL-22, and the luciferase activities in the transfected cells were measured. IL-22 was able to inhibit luciferase activities in *H. pylori*-infected AGS cells transfected with either pGL3-C/EBPm or pGL3-SP-1m, but not in AGS cells transfected with pGL3-NF-κBm or pGL-d91-50 (Fig. 5B). These results suggest that NF-κB was involved in the IL-22-attenuated CCL20 induction. To further confirm this notion, an NF-κB luciferase reporter construct containing five copies of an NF-κB response element was transfected into AGS cells followed by *H. pylori* infection in the presence or absence of IL-22. As shown in Fig. 5C, *H. pylori*-induced NF-κB luciferase

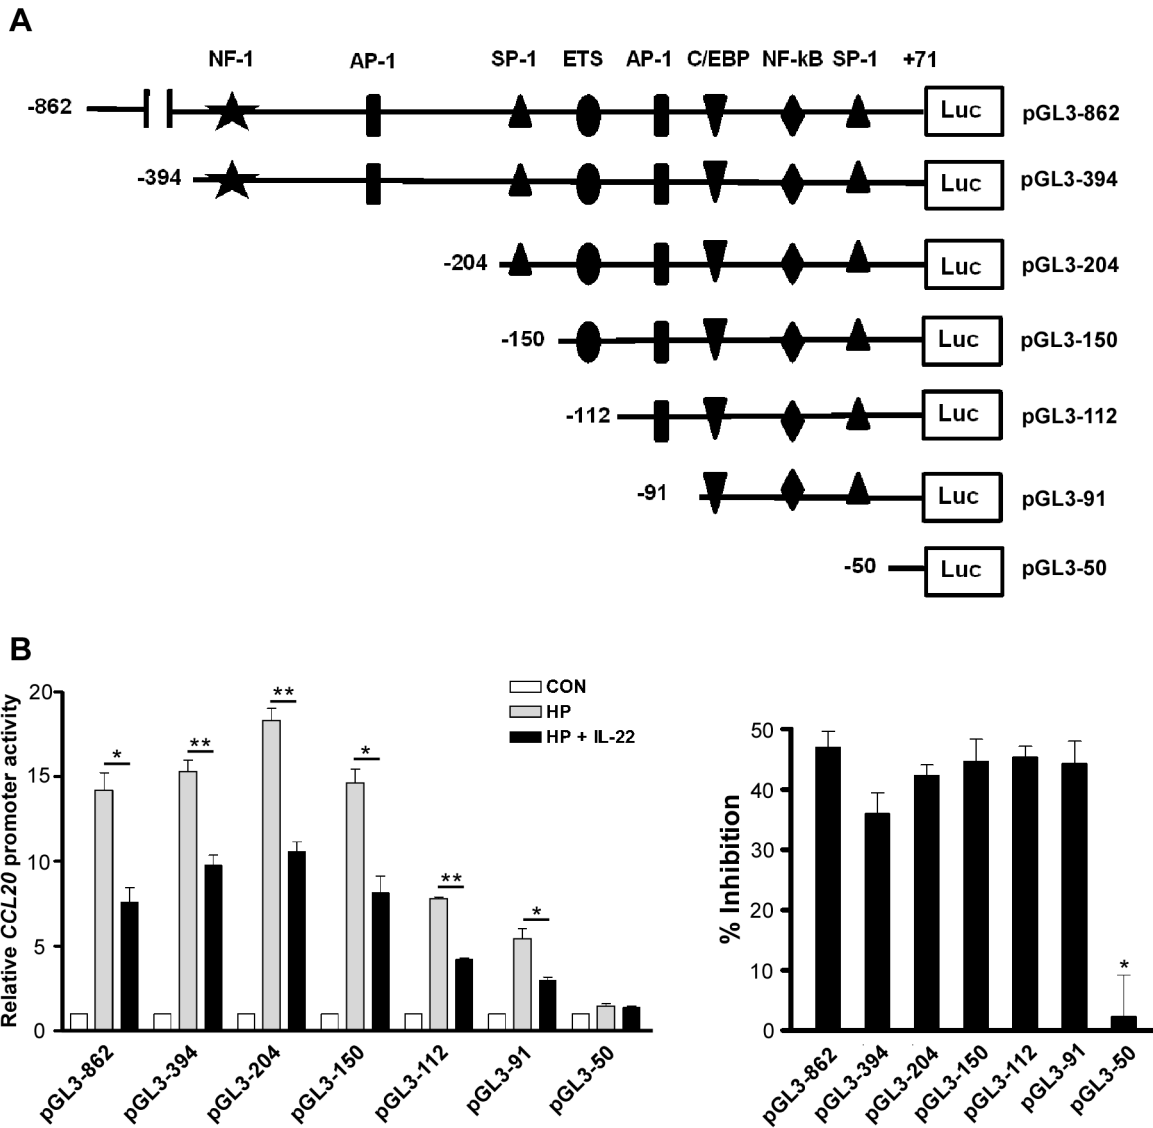

**Figure 4. The *CCL20* promoter region (nucleotides -91 to -50) is critical for the IL-22-attenuated *CCL20* expression.** *A*, Schematic representation of luciferase reporter constructs containing different lengths of the *CCL20* promoter. The locations of putative binding sites for various transcription factors are indicated at top. *B*, Inhibition of *H. pylori*-induced *CCL20* promoter activity by IL-22. Left panel, AGS cells were co-transfected with the indicated *CCL20* promoter constructs and pRL-TK *Renilla* luciferase plasmid. At 48 h after transfection, cells were infected with *H. pylori* in the presence or absence of IL-22. Luciferase activity was normalized to the expression of a co-transfected pRL-TK *Renilla* luciferase plasmid. The activity of each construct is presented as relative luciferase activity of *H. pylori*-infected cells versus uninfected cells (open bar; set as 1). \*,  $p < 0.02$ ; \*\*,  $p < 0.005$  for *H. pylori* + IL-22 versus *H. pylori* only. Right panel, the inhibitory efficiency (% inhibition) was calculated as follows:  $[(CCL20 \text{ promoter activity in the absence of IL-22} - CCL20 \text{ promoter activity in the presence of IL-22}) / CCL20 \text{ promoter activity in the absence of IL-22}] \times 100$ . Data represent mean  $\pm$  SEM from three independent experiments. \*,  $p < 0.05$  for pGL3-50 versus other reporter constructs. doi:10.1371/journal.pone.0097350.g004

activity was inhibited by the presence of IL-22 ( $p < 0.05$ ). Taken together, results from the reporter assays clearly indicate that the NF-κB consensus binding site in the *CCL20* promoter is critical for conferring the inhibitory effect of IL-22 on *H. pylori*-induced *CCL20* expression.

We then examined whether IL-22 prevented the degradation of IκB or the nuclear translocation of NF-κB, leading to reduced levels of NF-κB. Western blotting showed that *H. pylori* infected AGS cells with or without IL-22 treatment had similar levels of NF-κB in the nuclei (Fig. 6A) and that IL-22 did not affect the degradation of IκB (Fig. 6B). The results suggested that the inhibitory effect of IL-22 on *H. pylori*-induced *CCL20* expression

was not due to impaired NF-κB activation, but more likely due to reduced binding of NF-κB to the NF-κB consensus binding site in the *CCL20* promoter after nuclear translocation of NF-κB.

We further conducted EMSA to demonstrate that NF-κB binding to the NF-κB consensus binding site in *CCL20* promoter was critical for IL-22-attenuated *CCL20* induction. Nuclear extracts from AGS cells infected with *H. pylori* in the absence or presence of IL-22 were incubated with a <sup>32</sup>P-labelled oligonucleotide probe comprising the NF-κB binding site in the *CCL20* promoter, and the presence of NF-κB in the binding complexes was detected by supershift reactions with antibodies specific to p50 or p65 NF-κB subunits. As shown in Fig. 7A, the radioactive

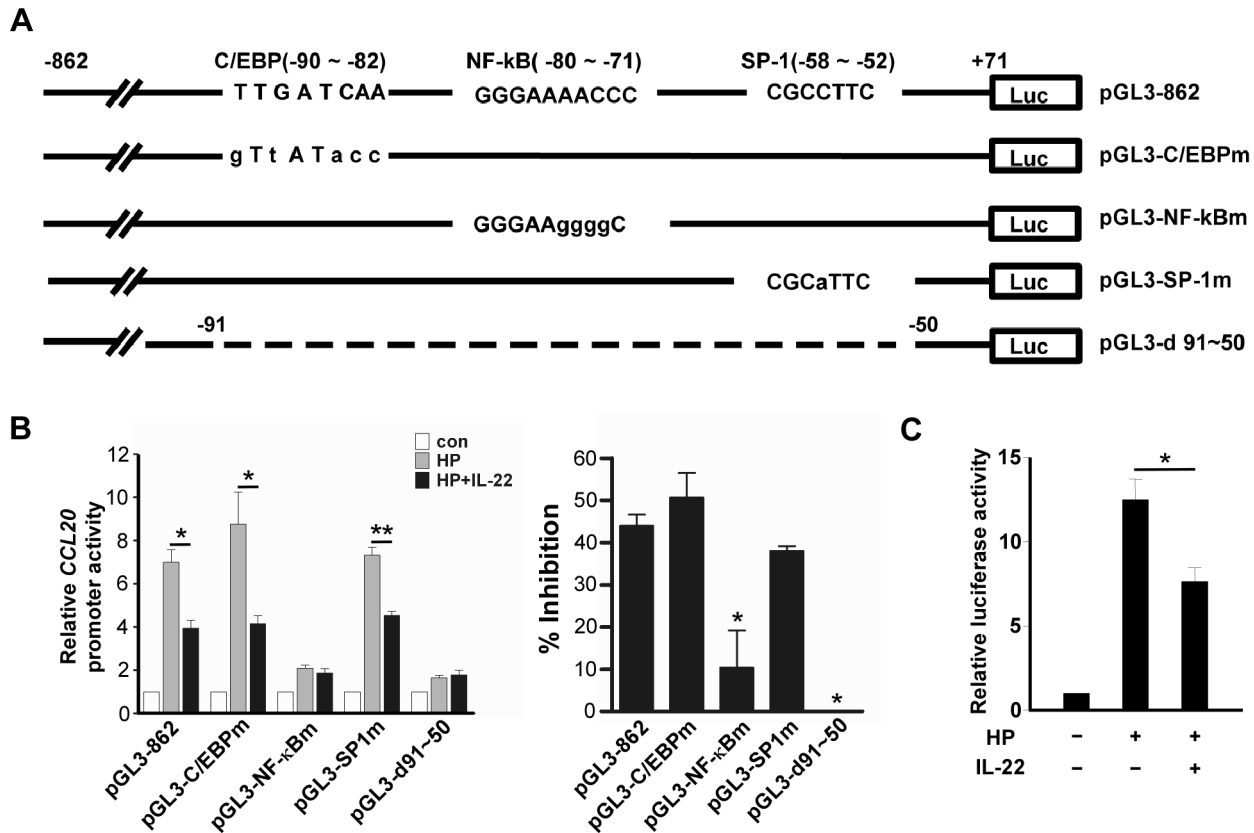

**Figure 5. The NF- $\kappa$ B binding site in the *CCL20* promoter is critical for the IL-22-attenuated *CCL20* expression.** **A**, Schematic representation of mutated or deleted *CCL20* reporter constructs. Nucleotide substitutions are indicated in lower case and the deleted region is indicated as dash line. **B**, Inhibitory effects of IL-22 on *CCL20* promoter activities. Left panel, AGS cells were co-transfected with the indicated *CCL20* promoter constructs and pRL-TK *Renilla* luciferase plasmid. At 48 h after transfection, cells were infected with *H. pylori* in the presence or absence of IL-22 and the relative luciferase activity was measured. Data represent the mean  $\pm$  SEM from three independent experiments. \*,  $p < 0.05$ , \*\*,  $p < 0.005$  for *H. pylori* + IL-22 versus *H. pylori* only. Right panel, the inhibitory efficiency (% inhibition) were calculated as described in Fig. 4B. \*,  $p < 0.05$  versus pGL3-862, pGL3/EBPm or pGL3-SPm. **C**, Inhibitory effects of IL-22 on a promoter containing NF- $\kappa$ B binding sites. AGS cells were co-transfected with pGL4.32 NF- $\kappa$ B luciferase reporter and pRL-TK *Renilla* luciferase plasmid. At 48 h after transfection, cells were infected with *H. pylori* in the presence or absence of IL-22 and the relative luciferase activity was measured. Data represent the mean  $\pm$  SEM from three independent experiments. \*,  $p < 0.05$  for *H. pylori* + IL-22 versus *H. pylori* only. doi:10.1371/journal.pone.0097350.g005

DNA-protein complexes contained both p50/p50 homodimer and p50/p65 heterodimer, and the presence of excess cold probe diminished the complexes formation, demonstrating the specificity of the binding. The binding of both NF- $\kappa$ B p50/p50 and NF- $\kappa$ B p50/p65 to the NF- $\kappa$ B consensus binding site was reduced when nuclear extracts from AGS cells infected with *H. pylori* in the presence of IL-22 were used (Fig. 7B). Consistent with the EMSA results, the ChIP assay showed IL-22 significantly reduced the interaction of NF- $\kappa$ B p65 with the *CCL20* promoter in AGS cells ( $p < 0.02$ ) (Fig. 7C).

### The STAT3 signaling plays a role in the inhibitory effect of IL-22 on *H. pylori*-induced *CCL20* expression

IL-22 targets cells by binding to the IL-22R heterodimer to exert its biological function via STAT3 activation [22]. To investigate whether the IL-22-attenuated *CCL20* induction was mediated by STAT3, we silenced the endogenous STAT3 expression by transfecting STAT3 shRNA or siRNA into AGS cells followed by *H. pylori* infection in the absence or presence of IL-22. Western blotting showed that STAT3 was silenced efficiently by shSTAT3#8 but not shSTAT3#7 (Fig. 8A, upper panel), and as expected, the AGS cells transfected with

shSTAT3#8 showed significantly reduced IL-22-attenuated *CCL20* induction (shSTAT3#8 vs. sh-GFP,  $p < 0.02$ ) (Fig. 8A, lower panel). Similarly, both siRNA#a and siRNA#b significantly silenced endogenous STAT3 expression in AGS cells (Fig. 8B, upper panel) and reduced the inhibitory effect of IL-22 on the *H. pylori*-induced *CCL20* expression (siRNA#a vs. si-control,  $p < 0.0001$ ; siRNA#b vs. si-control,  $p < 0.002$ ) (Fig. 8B, lower panel). Taken together, these results indicate that knockdown of STAT3 significantly reduced, but not completely blocked, the IL-22-attenuated *CCL20* induction, suggesting that the inhibitory effect of IL-22 on the *H. pylori*-induced *CCL20* expression in AGS cells is dependent, in part, on STAT3 signaling.

Phosphorylation of STAT3 is critical for the IL-22 receptor signaling [22]. We thus examined whether STAT3 phosphorylation was required for IL-22-attenuated *CCL20* induction. We first silenced the endogenous STAT3 using siRNA#b which targeted 3'UTR of STAT3 and then transfected cells with a plasmid encoding either the wild-type STAT3 (WT-STAT3) or a dominant-negative phosphorylation-deficient STAT3 (DN-STAT3), and these transfectants were then infected with *H. pylori* in the absence or presence of IL-22 followed by the determination of *H. pylori*-induced *CCL20* expression. Although AGS cells

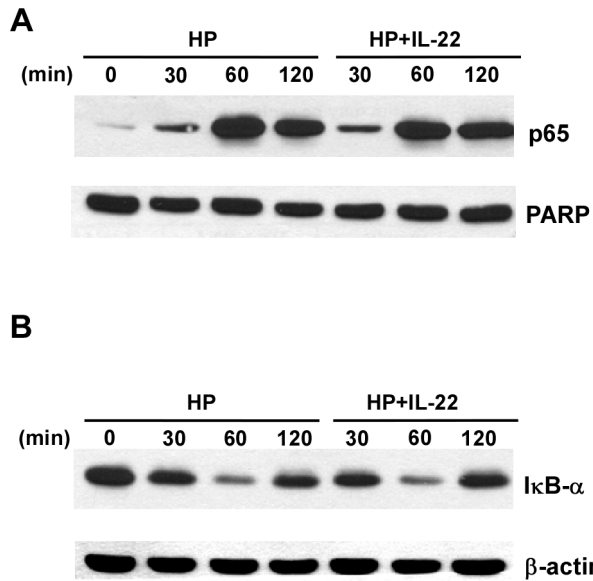

**Figure 6. IL-22 does not affect the nuclear translocation of NF- $\kappa$ B or degradation of I $\kappa$ B.** AGS cells were infected with *H. pylori* in the presence or absence of IL-22. The cells were lysed at indicated times and the lysates were subjected to nuclear fractionation. **A.** The nuclear fractions were run on a SDS-PAGE gel followed by immunoblotting with anti-NF- $\kappa$ B p65. The membrane was re-probed with an antibody against PARP, a nuclear marker. **B.** The cell lysates were subjected to SDS-PAGE followed by immunoblotting with an antibody to I $\kappa$ B- $\alpha$ . The membrane was stripped and re-probed with anti- $\beta$ -actin.  
doi:10.1371/journal.pone.0097350.g006

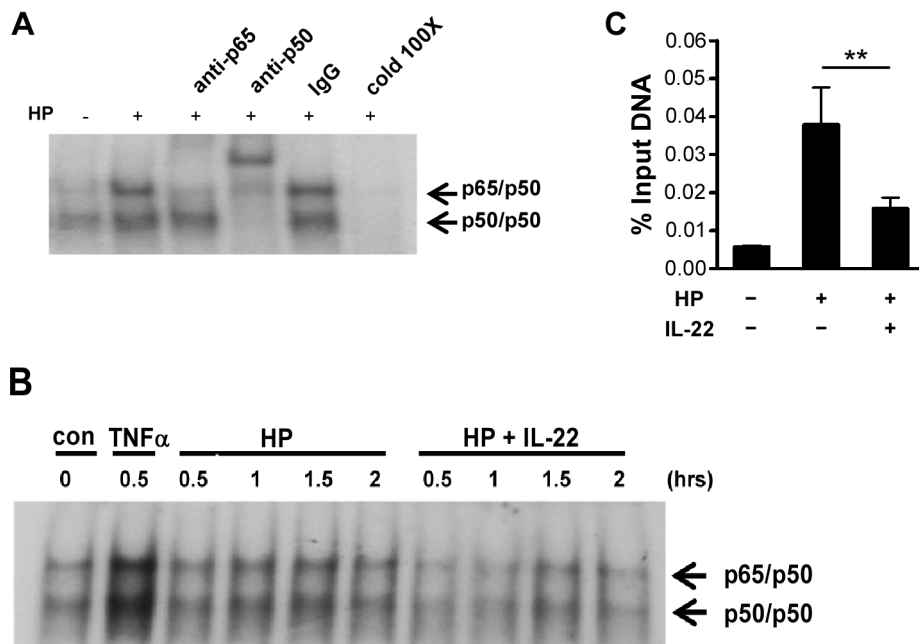

**Figure 7. IL-22 reduces the binding of NF- $\kappa$ B to the *CCL20* promoter in *H. pylori*-infected AGS cells.** **A.** EMSA supershift study of *CCL20*-specific NF- $\kappa$ B activation in *H. pylori*-infected AGS cells. Nuclear extracts isolated from AGS cells without (–) or with (+) *H. pylori* infection were incubated with a  $^{32}$ P-labelled probe containing the NF- $\kappa$ B binding sequence in the *CCL20* promoter and either excess cold probe (cold 100X), control antibody (IgG), or an antibody to NF- $\kappa$ B p50 or p65 subunit and then subjected to EMSA analysis. **B.** Effects of IL-22 on the binding of NF- $\kappa$ B to the *CCL20* promoter. AGS cells were infected with *H. pylori* in the absence or presence of IL-22 and nuclear extracts were isolated at the indicated times post-infection and subjected to EMSA analysis. TNF- $\alpha$  treated AGS cells were used as a positive control for NF- $\kappa$ B activation. **C.** ChIP assay for the binding of NF- $\kappa$ B p65 to the endogenous *CCL20* promoter. Chromatin was prepared from AGS cells infected with *H. pylori* in the absence or presence of IL-22. NF- $\kappa$ B p65 binding to the *CCL20* promoter was determined by ChIP assay using an anti-p65 antibody for immunoprecipitation. Immunoprecipitated DNA from each sample was assayed by PCR for the presence of the *CCL20* promoter and the result was normalized to the input DNA control. Data represent the mean  $\pm$  SEM from four independent experiments. \*\*,  $p < 0.02$  for *H. pylori* + IL-22 versus *H. pylori* only.  
doi:10.1371/journal.pone.0097350.g007

transfected with WT-STAT3 showed an increased level of phosphorylated STAT3 (pSTAT3) and significant inhibitory effect of IL-22 on the *H. pylori*-induced CCL20 expression compared to cells transfected with the cloning vector (WT-STAT3 vs. vector,  $p < 0.01$ ), cells transfected with DN-STAT3 showed no difference in both the level of pSTAT3 and inhibitory effect on CCL20 expression (Fig. 8C). These results suggest that phosphorylation of STAT3 is required for the IL-22-attenuated CCL20 induction.

#### IL-6 shows less inhibitory effects than IL-22 on the *H. pylori*-induced CCL20 expression in AGS cells due to weaker and transient phosphorylation of STAT3

We have shown that IL-22-attenuated CCL20 induction is mediated by STAT3 activation (Fig. 8). IL-6 is known as a pro-inflammatory cytokine and its signaling through STAT3 is found in many inflammatory diseases [50,51]. We next examined whether IL-6 also inhibited *H. pylori*-induced CCL20 expression. AGS cells were infected with *H. pylori* in the absence or presence of IL-22 or IL-6, and the expression of CCL20 was determined. IL-6 or IL-22 alone did not induce CCL20 expression in AGS cells without *H. pylori* infection (Fig. 9A). Although both IL-6 and IL-22 were capable of inhibiting *H. pylori*-induced CCL20 expression in AGS cells (*H. pylori* +IL-22 vs. *H. pylori*,  $p < 0.0001$ ; *H. pylori* +IL-6 vs. *H. pylori*,  $p < 0.001$ ), IL-6 elicited significantly less inhibition compared to IL-22 (*H. pylori* +IL-22 vs. *H. pylori* +IL-6,  $p < 0.0001$ ) (Fig. 9A). Given that the inhibition of *H. pylori*-induced CCL20 expression in AGS cells involved STAT3, as shown above, we reasoned that the difference in the inhibitory efficiency of IL-6 and IL-22 on the *H. pylori*-induced CCL20 expression might be due to a difference in the kinetics of STAT3 phosphorylation between



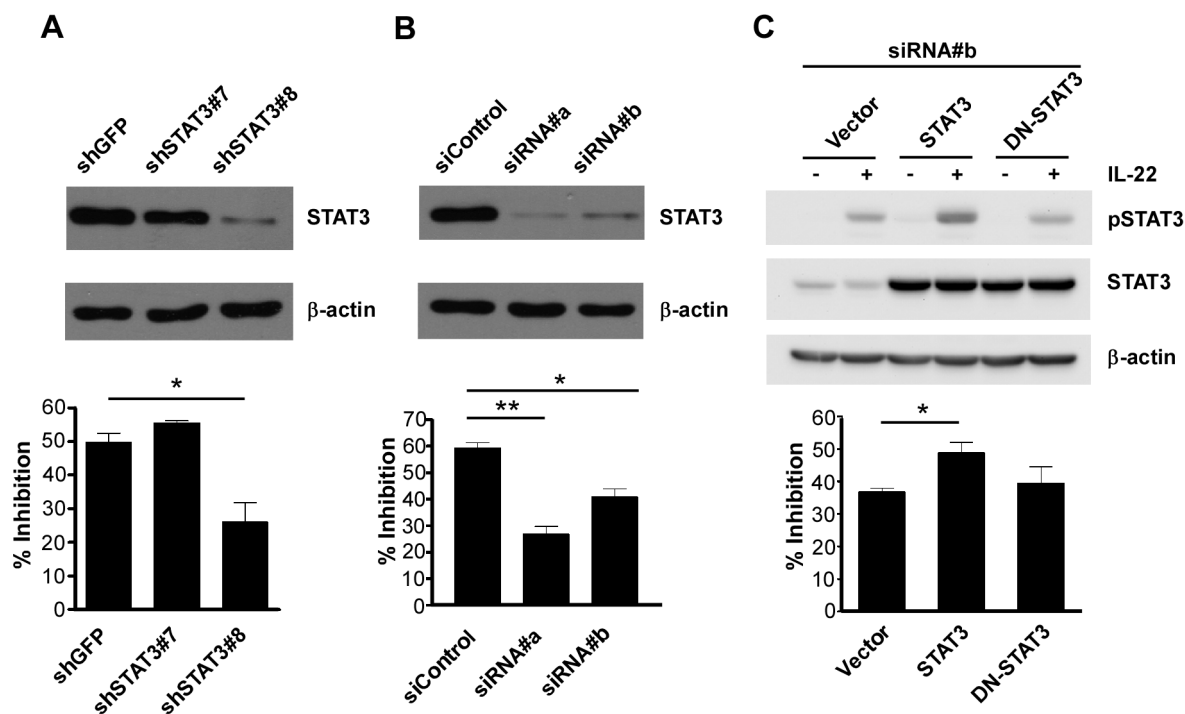

**Figure 8. Knockdown of STAT3 reduces the inhibitory effect of IL-22 on *H. pylori*-induced CCL20.** *A*, Knockdown of STAT3 with shRNAs. AGS cells were infected with lentivirus carrying STAT3-specific shRNA clone 7 or clone 8 for 24 h. After puromycin selection for another 48 h, total cell lysates were subjected to immunoblotting with anti-STAT3. The membrane was stripped and re-probed with anti- $\beta$ -actin (upper panel). The cells with STAT3 knockdown were infected with *H. pylori* in the presence or absence of IL-22, and the culture supernatants were collected for the determination of CCL20 concentration by ELISA. The lower panel shows the inhibitory efficiency (% inhibition), which was calculated as follows: [(CCL20 concentration in *H. pylori*-infected cells without IL-22 – CCL20 concentration in *H. pylori*-infected cells with IL-22) / CCL20 concentration in *H. pylori*-infected cells without IL-22]  $\times$  100. Data represent the mean  $\pm$  SEM and reflect one representative of four independent experiments. \*,  $p < 0.02$  versus sh-GFP. *B*, Knockdown of STAT3 with siRNAs. Similar to (*A*) except that siRNA#a and siRNA#b were used to knockdown STAT3. The lower panel shows the inhibitory efficiency, which was calculated as described in (*A*). Data represent the mean  $\pm$  SEM and reflect one representative of two independent experiments. \*,  $p < 0.002$  versus si-control; \*\*,  $p < 0.0001$  versus si-control. *C*, AGS cells were transfected with siRNA#b together with either the expression vector encoding wild-type STAT3 (WT-STAT3) or the expression vector encoding dominant-negative STAT3 (DN-STAT3). Total cell lysates were subjected to immunoblotting with anti-phospho-STAT3 and the membrane was stripped and re-probed with anti-STAT3 (upper panel). At 36-h post-transfection, the transfectants were infected with *H. pylori* in the presence or absence of IL-22 followed by the determination of CCL20 in cell culture supernatants 6-h post-infection (lower panel). The inhibitory efficiency was calculated as described in (*A*). Data represent the mean  $\pm$  SEM from three independent experiments. \*,  $p < 0.01$  versus vector. doi:10.1371/journal.pone.0097350.g008

IL-6 and IL-22 treated cells. We therefore performed Western blotting using an antibody specific for phosphorylated STAT3 (Tyr705) and found that cells treated with IL-22 with or without *H. pylori* infection showed significantly strong and prolonged phosphorylation of STAT3, while cells treated with IL-6 showed rather weak and transient STAT3 phosphorylation (Fig. 9B). Taken together, these results suggest that strong and prolonged STAT3 phosphorylation is likely critical for the inhibition of *H. pylori*-induced CCL20 by IL-22. We constantly observed that in AGS cells infected with *H. pylori* in the presence of IL-6, STAT3 phosphorylation reappeared at 120 min after it declined to almost undetectable levels at 60 min after infection (Fig. 9B). The molecular mechanism attributing to the phenomenon is currently unknown. One possibility is that *H. pylori* CagA might activate STAT3 phosphorylation in the later stage of infection [52] and cause the rebounded STAT3 phosphorylation.

#### IL-22 expression is inversely associated with the CCL20 expression in patients with *H. pylori*-induced gastric MALToma

To evaluate whether our findings have any clinical implication, we examined the levels of IL-22 and CCL20 expression in gastric

tissue sections from patients with *H. pylori*-induced MALToma by IHC staining (Fig. S2). There was an inverse association between the expression level of IL-22 and that of CCL20 ( $p < 0.05$ , Table 1), suggesting that IL-22 may have a regulatory role *in vivo* in controlling the *H. pylori*-induced CCL20 expression.

#### Discussion

The CCR6/CCL20 axis plays crucial roles in the homeostasis of gut-associated lymphoid tissues and in the regulation of mucosal immunity [35,36,53]. Increased CCL20 expression has been observed in gastrointestinal inflammation [35,36] as well as skin inflammation [54,55]. Studies have shown that *H. pylori* infection induces CCL20 expression in gastric tissues of human patients or neonatally thymectomized mice, and that CCL20 is selectively produced by gastric epithelial cells [38–41]. In this study, we have investigated the molecular mechanism underlying *H. pylori*-induced CCL20 expression by both promoter truncation and mutation assays, and found that a NF- $\kappa$ B consensus binding site in the *CCL20* promoter was crucial for the induction of CCL20 by *H. pylori* infection. This notion was further confirmed by chromatin immunoprecipitation assay showing direct binding of NF- $\kappa$ B to the *CCL20* promoter. Although we demonstrated that the

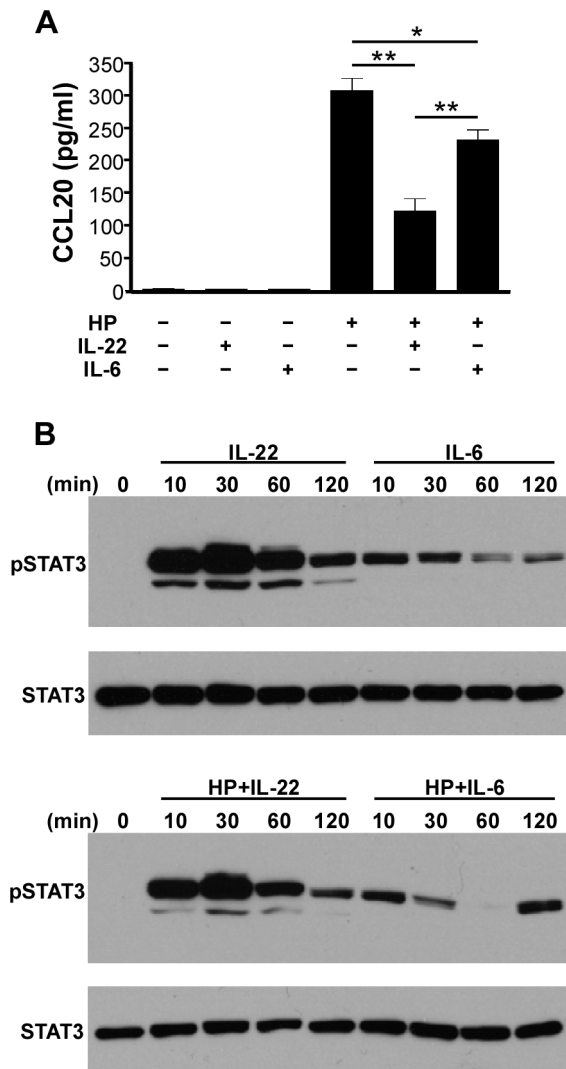

**Figure 9. IL-6 elicits lower STAT3 phosphorylation and exerts less inhibition on CCL20 expression than IL-22.** *A*, Inhibitory effects of IL-22 and IL-6 on *H. pylori*-induced CCL20 expression. AGS cells were infected without or with *H. pylori* in the presence or absence of IL-22 or IL-6. The cell culture supernatants were collected 6 h post-infection and subjected to ELISA determination of CCL20 concentration. Data represent the mean  $\pm$  SEM and reflect one representative of three independent experiments. \*,  $p < 0.001$ ; \*\*,  $p < 0.0001$ . *B*, Effects of IL-22 and IL-6 on STAT3 phosphorylation. AGS cells were infected without (upper panel) or with (lower panel) *H. pylori* followed by stimulation with IL-22 (10 ng/ml) or IL-6 (100 ng/ml). At the indicated times, the cells were lysed and subjected to SDS-PAGE followed by immunoblotting with a phospho-STAT3 (tyrosine 705) specific antibody. The membrane was stripped and re-probed with anti-STAT3. doi:10.1371/journal.pone.0097350.g009

induction of CCL20 expression by *H. pylori* infection is mediated by transcription regulation through NF- $\kappa$ B activation, the upstream molecules utilized by *H. pylori* to trigger NF- $\kappa$ B activation and subsequent induction of CCL20 expression remain elusive. TLR2, TLR4 and TLR5 have been suggested to be responsible for the recognition of *H. pylori* [56] and subsequent mediation of NF- $\kappa$ B activation; however, this notion has been questioned due to the low intrinsic activities of *H. pylori* lipopolysaccharide and flagellin on TLR activation. Additionally, NOD1 has also been reported to sense *H. pylori* and lead to NF- $\kappa$ B activation [57]; however this is also debatable because peptidoglycan does not seem to be the bacterial factor that activates NF- $\kappa$ B [58]. Identifying host factors responsible for NF- $\kappa$ B activation that subsequently leads to CCL20 induction warrants further investigation.

Interestingly, we found that IL-22 was able to regulate *H. pylori*-induced CCL20 expression. Accumulating evidence has shown that IL-22 plays a role in intestinal immunity, particularly in the regulation of intestinal epithelial cells' integrity and restitution [59]. Evidence for this pivotal role of IL-22 in host defense at epithelial barriers is further strengthened by the notion that IL-22 receptor (IL-22R1) is expressed exclusively in barrier tissues, such as skin, respiratory and digestive tissues [21]. IL-22 knockout mice showed impairments in the synthesis of antimicrobial proteins in keratinocytes and epithelial cells of intestine and lung to mediate innate host defense against bacteria [21,24,60]. Furthermore, IL-22 knockout mice failed to maintain the integrity and/or restitution of intestinal epithelial cells [59]. On the other hand, despite its protective role, IL-22 has also been reported to be associated with inflammatory diseases in skin [61,62] and colon [63]. IL-22 has thus been considered to function as a double-edged sword in intestinal inflammatory responses, i.e. pro-inflammatory versus anti-inflammatory responses. The opposite biological consequences of IL-22 observed in intestinal tissues are likely a result of different context of the cells, tissues, cytokine milieu and disease models being used. In the present study, we demonstrated that IL-22R is also expressed in gastric epithelial cells and found that IL-22 inhibits *H. pylori*-induced CCL20, suggesting that IL-22 may serve as a negative regulator for *H. pylori*-induced CCL20, preventing overproduction of inflammatory chemokine-CCL20 from gastric epithelial cells to maintain a balance of immune responses. Additionally, IL-22 has been shown to enhance intestinal epithelial restitution, wound healing and mucus barrier in intestine. Similarly, IL-22 may play a role in epithelial cells recovery repair as well as controlling bacteria infection in gastric tissues. It is plausible that induction of CCL20 in epithelial cells during early phase of *H. pylori* infection may be important for recruiting CCR6-bearing DC, ILC3, and Th17 cells to control the pathogen. However, it is critical to have a "guardian", in this case IL-22, to prevent overproduction of CCL20 during the late phase of infection leading to tissue damages caused by amplified inflammatory responses.

**Table 1.** The IL-22 expression is inversely associated with CCL20 expression in gastric mucosa tissues evaluated by IHC.

|                         | CCL20 Negative (N = 13) | CCL20 Positive (N = 11) |
|-------------------------|-------------------------|-------------------------|
| IL-22 Negative (N = 14) | 5 (35.7%)               | 9 (64.3%)               |
| IL-22 Positive (N = 10) | 8 (80%)                 | 2 (20%)                 |

Gastric mucosa specimens (n = 24) obtained from patients with *H. pylori*-induced MALToma were subjected to immunohistochemistry analysis for detecting CCL20 and IL-22 expression. Samples were assigned positive or negative for the expression as described in the MATERIALS AND METHODS section. Statistical significance of the differences was determined by the Fisher's exact test with  $p = 0.047$ . doi:10.1371/journal.pone.0097350.t001

We further demonstrated that the inhibitory effect of IL-22 on *H. pylori*-induced CCL20 production in gastric epithelial cells is, in part, STAT3-dependent since knockdown of STAT3 in the cells significantly attenuated, but not completely inhibited CCL20 expression. Despite that STAT3 activation by IL-6 has been considered detrimental in intestinal inflammation [64], our study showed that STAT3 activation by IL-22 seems beneficial, preventing overproduction of inflammatory chemokine-CCL20. Several studies have also found that STAT3 activation is able to attenuate inflammation. Welte et al. demonstrated that deficiency of STAT3 in DC or B cells results in enhanced NF- $\kappa$ B activation upon stimulation of TLRs, indicating that STAT3 activation down-regulates NF- $\kappa$ B activation in hematopoietic cells [65]. Yu et al. showed that STAT3 inhibits iNOS transcription by interacting with NF- $\kappa$ B, which serves to control the level of iNOS so as to avoid cytotoxic effects of NO to the host [66]. Our current study demonstrates that STAT3 phosphorylation elicited by IL-22 is able to attenuate CCL20 expression induced by *H. pylori* infection and that *H. pylori* induces CCL20 expression via NF- $\kappa$ B activation, suggesting that STAT3 activation likely interferes with NF- $\kappa$ B activation and subsequently leads to the decrease of CCL20 expression. Given that IL-22-stimulated STAT3 activation in intestinal epithelial cells is critical for mucosal wound healing [59] and that our present study shows that IL-22 attenuated *H. pylori*-induced CCL20 expression in gastric epithelial cells is mediated by STAT3 activation, it is plausible that the IL-22-STAT3 axis plays a protective role in gastric mucosal inflammation.

Although IL-6 signals through STAT3 phosphorylation, we found that IL-6 inhibited *H. pylori*-induced CCL20 less efficiently as compared to IL-22. The discernable difference of STAT3 activation between IL-22 and IL-6 may lie in the duration of STAT3 phosphorylation (Fig. 9). IL-22 induces a strong and sustained STAT3 phosphorylation, while IL-6 induces a weak and transient STAT3 phosphorylation. It seems that sustained STAT3 phosphorylation may be critical for the anti-inflammatory property. It is noted that IL-10, an anti-inflammatory cytokine exclusively targeting hematopoietic cells, also induces strong and sustained STAT3 phosphorylation in hematopoietic cells [67]. If sustained STAT3 phosphorylation is important for the anti-inflammatory effect for IL-22 or IL-10, IL-22 and IL-10 should be able to prolong the half-life of STAT3 phosphorylation more than IL-6. The key molecule that determines the half-life of STAT3 phosphorylation is suppressor of cytokine signaling-3 (SOCS3), which inactivates and degrades STAT3 [67]. The gp130 of IL-6R has docking sites for SOCS3. Neither IL-10R nor IL-22R binds SOCS3 due to the lack of SOCS3 docking site. Therefore, upon IL-10 or IL-22 stimulation in cells, STAT3 is phosphorylated and SOCS3 fails to terminate STAT3 phosphorylation, resulting in prolonged STAT3 phosphorylation. The absence of negative regulatory effects on IL-22 by SOCS3 may be, in part, a critical step in establishing the anti-inflammatory response. The next important question would be how STAT3 mediates IL-22 to exert its anti-inflammatory response in gastric epithelial cells upon *H. pylori* infection. Several *in vitro* studies have demonstrated that STAT3 is able to downregulate NF- $\kappa$ B activity and inhibit the transcription of NF- $\kappa$ B driven genes [65,66]. Furthermore, STAT3 has been shown to directly interact with NF- $\kappa$ B p65 and serve as a dominant-negative inhibitor of NF- $\kappa$ B activity [66]. We have been unable to demonstrate the interaction of NF- $\kappa$ B and STAT3 in *H. pylori*-infected AGS cells (data not shown). By examining the *CCL20* promoter sequence, we found that there is a putative STAT3 binding sequence, TTN<sub>4-6</sub>AA [68,69] (from -83 to -90), right before the NF- $\kappa$ B binding site. It is plausible that

phosphorylated STAT3 may compete spatially with NF- $\kappa$ B for the binding site and thus interfere with the binding of NF- $\kappa$ B to its consensus binding sequence. Interestingly, it has been reported that unphosphorylated STAT3 facilitates NF- $\kappa$ B activation and subsequently promotes the expression of a chemokine-CCL5 [70]. Our present study shows that IL-22 stimulates a prolonged and sustained STAT3 phosphorylation, which may decrease the availability of unphosphorylated STAT3 in cells and reduce NF- $\kappa$ B activation and subsequently CCL20 expression. It is speculated that the sustained phosphorylated STAT3 may act as a transrepressor, which expels NF- $\kappa$ B from the *CCL20* promoter, thus inhibiting the transcription of *CCL20*. The mechanism on how STAT3 inhibits NF- $\kappa$ B activation during *H. pylori* infection warrants further investigation.

Finally, we examined whether the inhibitory effect of IL-22 on *H. pylori*-induced CCL20 expression in gastric epithelial cells can be recapitulated in clinical settings. Gastric specimens of patients with *H. pylori*-induced gastric MALToma showing detectable levels of IL-22 expression tend to have undetectable levels of CCL20 expression, suggesting an inverse association of IL-22 expression and CCL20 expression *in vivo*. Based on the *in vitro* data and the clinical observation in this study, IL-22 appears to play a beneficial and/or protective role in *H. pylori*-induced gastric diseases, preventing overproduction of inflammatory cytokines and maintaining the homeostasis of gastric immunity.

## Supporting Information

**Figure S1 Knockdown of IL-22R1 in AGS cells reduces the inhibitory effect of IL-22 on *H. pylori*-induced CCL20 expression.** **A**, AGS cells with IL-22R1 knocked down by siRNA were stained with an isotype control antibody (red) or an anti-IL-22R1 antibody (green) conjugated with allophycocyanin followed by FACS analysis. AGS cells treated with a nonspecific siRNA were used as a control (blue). **B**, The AGS cells with IL-22R1 knockdown were infected with *H. pylori* in the presence or absence of IL-22, and CCL20 in culture supernatants was determined by ELISA. The % inhibition was calculated as described in Fig. 4B.

(TIF)

**Figure S2 IL-22 expression is inversely associated with the CCL20 expression in patients with *H. pylori*-induced MALToma.** Gastric mucosa samples from patients with *H. pylori*-induced MALToma were subjected to the detection of CCL20 and IL-22 expression by IHC using the Super Sensitive Polymer-HRP IHC Detection System. Representative immunostaining images of CCL20 (**A**) and IL-22 (**B**) are shown, with panel (a) and panel (b) showing examples of negative and positive staining, respectively.

(TIF)

## Acknowledgments

We are grateful to Dr. Joanne Chen for providing plasmids encoding wild-type STAT3 and dominant-negative STAT3, to Dr. Derek J.-C. Tai for technical consultation on ChIP assay, to Drs. Hsin-Lin Lu and Mei-Yi Lu for assistance in experiments, to Dr. Hui-Min Wang for help with statistical analysis, and to Dr. Pauline Yen for critical reading of the manuscript.

## Author Contributions

Conceived and designed the experiments: JPC FL. Performed the experiments: JPC MSW SHK. Analyzed the data: JPC MSW SHK FL. Contributed reagents/materials/analysis tools: JPC MSW SHK FL. Wrote the paper: JPC FL.

## References

- Bodger K, Crabtree JE (1998) *Helicobacter pylori* and gastric inflammation. *Br Med Bull* 54: 139–150.
- Peek RM Jr, Crabtree JE (2006) *Helicobacter* infection and gastric neoplasia. *J Pathol* 208: 233–248.
- Parsonnet J, Hansen S, Rodriguez L, Gelb AB, Warnke RA, et al. (1994) *Helicobacter pylori* infection and gastric lymphoma. *N Engl J Med* 330: 1267–1271.
- Bamford KB, Fan X, Crowe SE, Leary JF, Gourley WK, et al. (1998) Lymphocytes in the human gastric mucosa during *Helicobacter pylori* have a T helper cell 1 phenotype. *Gastroenterology* 114: 482–492.
- Sommer F, Faller G, Konturek P, Kirchner T, Hahn EG, et al. (1998) Antrum- and corpus mucosa-infiltrating CD4(+) lymphocytes in *Helicobacter pylori* gastritis display a Th1 phenotype. *Infect Immun* 66: 5543–5546.
- Smythies LE, Waites KB, Lindsey JR, Harris PR, Ghiara P, et al. (2000) *Helicobacter pylori*-induced mucosal inflammation is Th1 mediated and exacerbated in IL-4, but not IFN- $\gamma$ , gene-deficient mice. *J Immunol* 165: 1022–1029.
- Eaton KA, Mefford M, Thevenot T (2001) The role of T cell subsets and cytokines in the pathogenesis of *Helicobacter pylori* gastritis in mice. *J Immunol* 166: 7456–7461.
- Mizuno T, Ando T, Nobata K, Tsuzuki T, Maeda O, et al. (2005) Interleukin-17 levels in *Helicobacter pylori*-infected gastric mucosa and pathologic sequelae of colonization. *World J Gastroenterol* 11: 6305–6311.
- Caruso R, Fina D, Paoluzi OA, Del Vecchio Blanco G, Stolfi C, et al. (2008) IL-23-mediated regulation of IL-17 production in *Helicobacter pylori*-infected gastric mucosa. *Eur J Immunol* 38: 470–478.
- Khamri M, Walker MM, Clark P, Atherton JC, Thursz MR, et al. (2010) *Helicobacter pylori* stimulates dendritic cells to induce interleukin-17 expression from CD4+ T lymphocytes. *Infect Immun* 78: 845–853.
- Sonnenberg GF, Fouser LA, Artis D (2011) Border patrol: regulation of immunity, inflammation and tissue homeostasis at barrier surfaces by IL-22. *Nat Immunol* 12: 383–390.
- Liang SC, Tan XY, Luxenberg DP, Karim R, Dunussi-Joannopoulos K, et al. (2006) Interleukin (IL)-22 and IL-17 are coexpressed by Th17 cells and cooperatively enhance expression of antimicrobial peptides. *J Exp Med* 203: 2271–2279.
- Trifari S, Kaplan CD, Tran EH, Crellin NK, Spits H (2009) Identification of a human helper T cell population that has abundant production of interleukin 22 and is distinct from T(H)-17, T(H)1 and T(H)2 cells. *Nat Immunol* 10: 864–871.
- Martin B, Hirota K, Cua DJ, Stockinger B, Veldhoen M (2009) Interleukin-17-producing gammadelta T cells selectively expand in response to pathogen products and environmental signals. *Immunity* 31: 321–330.
- Cella M, Fuchs A, Vermi W, Facchetti F, Otero K, et al. (2009) A human natural killer cell subset provides an innate source of IL-22 for mucosal immunity. *Nature* 457: 722–725.
- Colonna M (2009) Interleukin-22-Producing Natural Killer Cells and Lymphoid Tissue Inducer-like Cells in Mucosal Immunity. *Immunity* 31: 15–23.
- Spits H, Di Santo JP (2011) The expanding family of innate lymphoid cells: regulators and effectors of immunity and tissue remodeling. *Nat Immunol* 12: 21–27.
- Dumoutier L, Van Roost E, Colau D, Renauld JC (2000) Human interleukin-10-related T cell-derived inducible factor: molecular cloning and functional characterization as a hepatocyte-stimulating factor. *Proc Natl Acad Sci U S A* 97: 10144–10149.
- Xie MH, Aggarwal S, Ho WH, Foster J, Zhang Z, et al. (2000) Interleukin (IL)-22, a novel human cytokine that signals through the interferon receptor-related proteins CRF2-4 and IL-22R. *J Biol Chem* 275: 31335–31339.
- Kotenko SV, Izotova LS, Mirochnitchenko OV, Esterova E, Dickensheets H, et al. (2001) Identification of the functional interleukin-22 (IL-22) receptor complex: the IL-10R2 chain (IL-10Rbeta) is a common chain of both the IL-10 and IL-22 (IL-10-related T cell-derived inducible factor, IL-TIF) receptor complexes. *J Biol Chem* 276: 2725–2732.
- Wolk K, Kunz S, Witte E, Friedrich M, Asadullah K, et al. (2004) IL-22 increases the innate immunity of tissues. *Immunity* 21: 241–254.
- Lejeune D, Dumoutier L, Constantinescu S, Kruijer W, Schuringa JJ, et al. (2002) Interleukin-22 (IL-22) activates the JAK/STAT, ERK, JNK, and p38 MAP kinase pathways in a rat hepatoma cell line. Pathways that are shared with and distinct from IL-10. *J Biol Chem* 277: 33676–33682.
- Wolk K, Witte E, Wallace E, Docke WD, Kunz S, et al. (2006) IL-22 regulates the expression of genes responsible for antimicrobial defense, cellular differentiation, and mobility in keratinocytes: a potential role in psoriasis. *Eur J Immunol* 36: 1309–1323.
- Zheng Y, Valdez PA, Danilenko DM, Hu Y, Sa SM, et al. (2008) Interleukin-22 mediates early host defense against attaching and effacing bacterial pathogens. *Nat Med* 14: 282–289.
- Obonyo M, Rickman B, Guincy DG (2011) Effects of Myeloid Differentiation Primary Response Gene 88 (MyD88) Activation on *Helicobacter Infection In Vivo* and Induction of a Th17 Response. *Helicobacter* 16: 398–404.
- Baba M, Imai T, Nishimura M, Kakizaki M, Takagi S, et al. (1997) Identification of CCR6, the specific receptor for a novel lymphocyte-directed CC chemokine LARC. *J Biol Chem* 272: 14893–14898.
- Liao F, Rabin RL, Smith CS, Sharma G, Nutman TB, et al. (1999) CC-chemokine receptor 6 is expressed on diverse memory subsets of T cells and determines responsiveness to macrophage inflammatory protein 3 alpha. *J Immunol* 162: 186–194.
- Liao F, Shirakawa AK, Foley JF, Rabin RL, Farber JM (2002) Human B cells become highly responsive to macrophage-inflammatory protein-3 alpha/CC chemokine ligand-20 after cellular activation without changes in CCR6 expression or ligand binding. *J Immunol* 168: 4871–4880.
- Greaves DR, Wang W, Dairaghi DJ, Dieu MC, Saint-Vis B, et al. (1997) CCR6, a CC chemokine receptor that interacts with macrophage inflammatory protein 3alpha and is highly expressed in human dendritic cells. *J Exp Med* 186: 837–844.
- Singh SP, Zhang HH, Foley JF, Hedrick MN, Farber JM (2008) Human T cells that are able to produce IL-17 express the chemokine receptor CCR6. *J Immunol* 180: 214–221.
- Takatori H, Kanno Y, Watford WT, Tato CM, Weiss G, et al. (2009) Lymphoid tissue inducer-like cells are an innate source of IL-17 and IL-22. *J Exp Med* 206: 35–41.
- Sawa S, Cherrier M, Lochner M, Satoh-Takayama N, Fehling HJ, et al. (2010) Lineage relationship analysis of ROR $\gamma$ gammat+ innate lymphoid cells. *Science* 330: 665–669.
- Cook DN, Prosser DM, Forster R, Zhang J, Kuklin NA, et al. (2000) CCR6 mediates dendritic cell localization, lymphocyte homeostasis, and immune responses in mucosal tissue. *Immunity* 12: 495–503.
- Schutyster E, Struyf S, Van Damme J (2003) The CC chemokine CCL20 and its receptor CCR6. *Cytokine Growth Factor Rev* 14: 409–426.
- Williams IR (2006) CCR6 and CCL20: partners in intestinal immunity and lymphorganogenesis. *Ann N Y Acad Sci* 1072: 52–61.
- Ito T, Carson WF, Cavassani KA, Connett JM, Kunkel SL (2011) CCR6 as a mediator of immunity in the lung and gut. *Exp Cell Res* 317: 613–619.
- Bouskra D, Brezillon C, Berard M, Werts C, Varona R, et al. (2008) Lymphoid tissue genesis induced by commensals through NOD1 regulates intestinal homeostasis. *Nature* 456: 507–510.
- Nishi T, Okazaki K, Kawasaki K, Fukui T, Tamaki H, et al. (2003) Involvement of myeloid dendritic cells in the development of gastric secondary lymphoid follicles in *Helicobacter pylori*-infected neonatally thymectomized BALB/c mice. *Infect Immun* 71: 2153–2162.
- Wen S, Felley CP, Bouzourene H, Reimers M, Michetti P, et al. (2004) Inflammatory gene profiles in gastric mucosa during *Helicobacter pylori* infection in humans. *J Immunol* 172: 2595–2606.
- Wu YY, Tsai HF, Lin WC, Hsu PI, Shun CT, et al. (2007) Upregulation of CCL20 and recruitment of CCR6+ gastric infiltrating lymphocytes in *Helicobacter pylori* gastritis. *Infect Immun* 75: 4357–4363.
- Yoshida A, Isomoto H, Hisatsune J, Nakayama M, Nakashima Y, et al. (2009) Enhanced expression of CCL20 in human *Helicobacter pylori*-associated gastritis. *Clin Immunol* 130: 290–297.
- Chieh PF, Yang JC, Lin JT, Wang JT (1998) Molecular mechanisms of clarithromycin resistance in *Helicobacter pylori*. *J Formos Med Assoc* 97: 445–452.
- Maac E, Nielsen M, Steffensen KD, Jakobsen EH, Jakobsen A, et al. (2011) Estimation of immunohistochemical expression of VEGF in ductal carcinomas of the breast. *The journal of histochemistry and cytochemistry: official journal of the Histochemistry Society* 59: 750–760.
- Aujla SJ, Kolls JK (2009) IL-22: a critical mediator in mucosal host defense. *J Mol Med (Berl)* 87: 451–454.
- Wolk K, Witte E, Witte K, Warszawska K, Sabat R (2010) Biology of interleukin-22. *Semin Immunopathol* 32: 17–31.
- Sonnenberg GF, Fouser LA, Artis D (2010) Functional biology of the IL-22-IL-22R pathway in regulating immunity and inflammation at barrier surfaces. *Adv Immunol* 107: 1–29.
- Fujie S, Hieshima K, Izawa D, Nakayama T, Fujisawa R, et al. (2001) Proinflammatory cytokines induce liver and activation-regulated chemokine/macrophage inflammatory protein-3alpha/CCL20 in mucosal epithelial cells through NF-kappaB [correction of NK-kappaB]. *International immunology* 13: 1255–1263.
- Kwon JH, Keates S, Simeonidis S, Grall F, Libermann TA, et al. (2003) ESE-1, an enterocyte-specific Ets transcription factor, regulates MIP-3alpha gene expression in Caco-2 human colonic epithelial cells. *J Biol Chem* 278: 875–884.
- Kanda N, Shibata S, Tada Y, Nishi K, Tamaki K, et al. (2009) Prolactin enhances basal and IL-17-induced CCL20 production by human keratinocytes. *Eur J Immunol* 39: 996–1006.
- Nishimoto N, Kishimoto T (2004) Inhibition of IL-6 for the treatment of inflammatory diseases. *Current opinion in pharmacology* 4: 386–391.
- Rincon M (2012) Interleukin-6: from an inflammatory marker to a target for inflammatory diseases. *Trends in immunology* 33: 571–577.
- Bronte-Tinkew DM, Terebiznik M, Franco A, Ang M, Ahn D, et al. (2009) *Helicobacter pylori* Cytotoxin-Associated Gene A Activates the Signal Transducer and Activator of Transcription 3 Pathway In vitro and In vivo. *Cancer Res* 69: 632–639.
- Kunkel EJ, Campbell DJ, Butcher EC (2003) Chemokines in lymphocyte trafficking and intestinal immunity. *Microcirculation* 10: 313–323.

54. Hedrick MN, Lonsdorf AS, Hwang ST, Farber JM (2010) CCR6 as a possible therapeutic target in psoriasis. *Expert Opin Ther Targets* 14: 911–922.
55. Mabuchi T, Chang TW, Quinter S, Hwang ST (2012) Chemokine receptors in the pathogenesis and therapy of psoriasis. *J Dermatol Sci* 65: 4–11.
56. Andersen-Nissen E, Smith KD, Strobe KL, Barrett SL, Cookson BT, et al. (2005) Evasion of Toll-like receptor 5 by flagellated bacteria. *Proc Natl Acad Sci U S A* 102: 9247–9252.
57. Viala J, Chaput C, Boneca IG, Cardona A, Girardin SE, et al. (2004) Nod1 responds to peptidoglycan delivered by the *Helicobacter pylori* cag pathogenicity island. *Nat Immunol* 5: 1166–1174.
58. Watanabe T, Asano N, Fichtner-Feigl S, Gorelick PL, Tsuji Y, et al. (2010) NOD1 contributes to mouse host defense against *Helicobacter pylori* via induction of type I IFN and activation of the ISGF3 signaling pathway. *J Clin Invest* 120: 1645–1662.
59. Pickert G, Neufert C, Leppkes M, Zheng Y, Wittkopf N, et al. (2009) STAT3 links IL-22 signaling in intestinal epithelial cells to mucosal wound healing. *J Exp Med* 206: 1465–1472.
60. Aujla SJ, Chan YR, Zheng M, Fei M, Askew DJ, et al. (2008) IL-22 mediates mucosal host defense against Gram-negative bacterial pneumonia. *Nat Med* 14: 275–281.
61. Zheng Y, Danilenko DM, Valdez P, Kasman I, Eastham-Anderson J, et al. (2007) Interleukin-22, a T(H)17 cytokine, mediates IL-23-induced dermal inflammation and acanthosis. *Nature* 445: 648–651.
62. Ma HL, Liang S, Li J, Napierata L, Brown T, et al. (2008) IL-22 is required for Th17 cell-mediated pathology in a mouse model of psoriasis-like skin inflammation. *J Clin Invest* 118: 597–607.
63. Kirchberger S, Royston DJ, Boulard O, Thornton E, Franchini F, et al. (2013) Innate lymphoid cells sustain colon cancer through production of interleukin-22 in a mouse model. *J Exp Med* 210: 917–931.
64. Atreya R, Neurath MF (2008) Signaling molecules: the pathogenic role of the IL-6/STAT-3 trans signaling pathway in intestinal inflammation and in colonic cancer. *Current drug targets* 9: 369–374.
65. Welte T, Zhang SS, Wang T, Zhang Z, Hesslein DG, et al. (2003) STAT3 deletion during hematopoiesis causes Crohn's disease-like pathogenesis and lethality: a critical role of STAT3 in innate immunity. *Proc Natl Acad Sci U S A* 100: 1879–1884.
66. Yu Z, Zhang W, Kone BC (2002) Signal transducers and activators of transcription 3 (STAT3) inhibits transcription of the inducible nitric oxide synthase gene by interacting with nuclear factor kappaB. *Biochem J* 367: 97–105.
67. El Kasmi KC, Holst J, Coffre M, Mielke L, de Pauw A, et al. (2006) General nature of the STAT3-activated anti-inflammatory response. *J Immunol* 177: 7880–7888.
68. Zhang D, Sun M, Samols D, Kushner I (1996) STAT3 participates in transcriptional activation of the C-reactive protein gene by interleukin-6. *J Biol Chem* 271: 9503–9509.
69. Cheng GZ, Zhang WZ, Sun M, Wang Q, Coppola D, et al. (2008) Twist is transcriptionally induced by activation of STAT3 and mediates STAT3 oncogenic function. *J Biol Chem* 283: 14665–14673.
70. Yang J, Liao X, Agarwal MK, Barnes L, Auron PE, et al. (2007) Unphosphorylated STAT3 accumulates in response to IL-6 and activates transcription by binding to NFkappaB. *Genes Dev* 21: 1396–1408.
